# Supplementary material
Source: Springer Nature journal article supplement (https://www.springermedizin.de/resource/supplementary/13075_2013_4012_MOESM5_ESM.pdf/9695836)

CONTROL

A

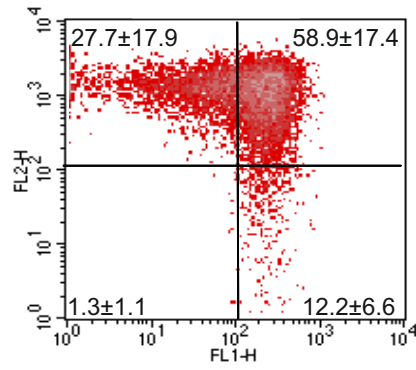

B

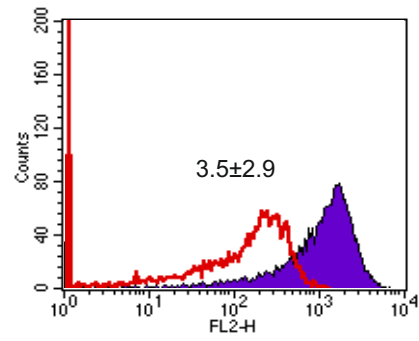

1 mM SNP

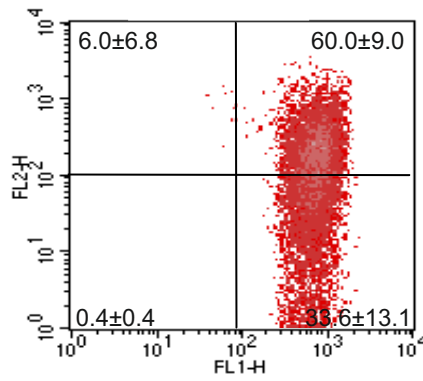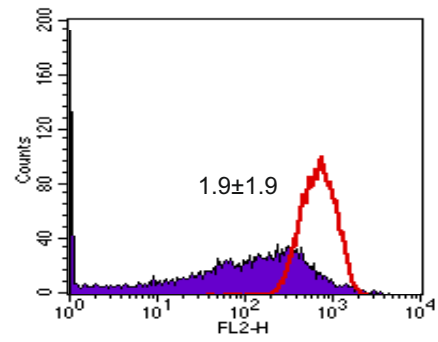

1 mM NOC-12

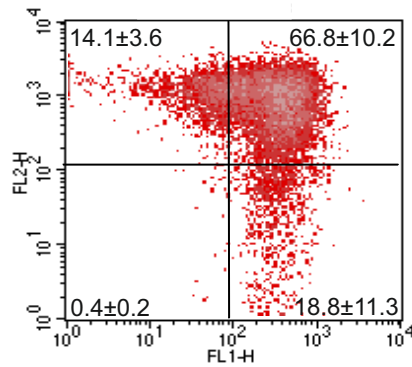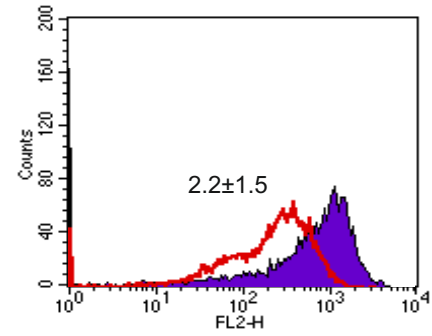

Supplement: MOESM5 [file 9695836]
